# Supplementary material for: A Genome-Scale Metabolic Reconstruction of Mycoplasma genitalium, iPS189
Source: PLoS Comput Biol. 2009 Feb 13;5(2):e1000285. doi: 10.1371/journal.pcbi.1000285 (PMC2633051; doi:10.1371/journal.pcbi.1000285)
Supplement: Table S1 — Reconstruction metabolite and reaction content (0.15 MB XLS) [file pcbi.1000285.s001.xls]

## Sheet: metab
abbreviation	name	formula	charge	formula, neutral	KEGG ID	CAS number
12dgr	1,2-Diacylglycerol	C5H6O5R2	0		C00641
12dag3p	1,2-Diacyl-sn-glycerol 3-phosphate	C5H5O8PR2	-2	C5H7O8PR2	C00416
10fthf	10-Formyltetrahydrofolate	C20H21N7O7	-2	C20H23N7O7	C00234
1ag3p	1-Acyl-sn-glycerol 3-phosphate	C4H6O7PR	-2	C4H8O7PR	C00681
dxyl5p	1-deoxy-D-xylulose 5-phosphate	C5H9O7P	-2	C5H11O7P	C11437
2dr1p	2-Deoxy-D-ribose 1-phosphate	C5H9O7P	-2	C5H11O7P	C00672
2dr5p	2-Deoxy-D-ribose 5-phosphate	C5H9O7P	-2	C5H11O7P	C00673	102916-66-5
2ins	2-Inosose	C6H10O6	0		C00691
2ohph	2-Octaprenyl-6-hydroxyphenol	C46H70O2	0		C05811
2omph	2-Octaprenyl-6-methoxyphenol	C47H72O2	0		C05812
akg	2-Oxoglutarate	C5H4O5	-2	C5H6O5	C00026	328-50-7
3pg	3-Phospho-D-glycerate	C3H4O7P	-3	C3H7O7P	C00197
13dpg	3-Phospho-D-glyceroyl phosphate	C3H4O10P2	-4	C3H8O10P2	C00236
4abut	4-Aminobutanoate	C4H9NO2	0	C4H9NO2	C00334	1956-12-02
4hba	4-Hydroxy-benzyl alcohol	C7H8O2	0
4mpetz	4-Methyl-5-(2-phosphoethyl)-thiazole	C6H8NO4PS	-2	C6H10NO4PS	C04327
methf	5,10-Methenyltetrahydrofolate	C20H20N7O6	-1	C20H22N7O6	C00445
mlthf	5,10-Methylenetetrahydrofolate	C20H21N7O6	-2	C20H23N7O6	C00143
thf	5,6,7,8-Tetrahydrofolate	C19H21N7O6	-2	C19H23N7O6	C00101	135-16-0
5aop	5-Amino-4-oxopentanoate	C5H9NO3	0	C5H9NO3	C00430	106-60-5
prpp	5-Phospho-alpha-D-ribose 1-diphosphate	C5H8O14P3	-5	C5H13O14P3	C00119
6pgg	6-Phospho-beta-D-glucosyl-(1,4)-D-glucose	C12H21O14P	-2	C12H23O14P	C04534
dhf	7,8-Dihydrofolate	C19H19N7O6	-2	C19H21N7O6	C00415	4033-27-6
acald	Acetaldehyde	C2H4O	0		C00084	75-07-0
ac	Acetate	C2H3O2	-1	C2H4O2	C00033	71-50-1
actp	Acetyl phosphate	C2H3O5P	-2	C2H5O5P	C00227	19926-71-7
accoa	Acetyl-CoA	C23H34N7O17P3S	-4	C23H38N7O17P3S	C00024	72-89-9
acoa	Acyl-CoA	C22H31N7O17P3RS	-4	C22H35N7O17P3RS	C00040
ade	Adenine	C5H5N5	0		C00147	73-24-5
adn	Adenosine	C10H13N5O4	0		C00212	58-61-7
adp	ADP	C10H12N5O10P2	-3	C10H15N5O10P2	C00008	58-64-0
ala-L-gln-L	ala-L-gln-L	C8H15N3O4	0	C8H15N3O4
ala-L-glu-L	ala-L-glu-L	C8H15N3O4	0	C8H15N3O4
ala-L-his-L	Alanylhistidine	C9H14N4O3	0	C9H14N4O3
tre6p	alpha,alpha'-Trehalose 6-phosphate	C12H21O14P	-2	C12H23O14P	C00689	4484-88-2
r1p	alpha-D-Ribose 1-phosphate	C5H9O8P	-2	C5H11O8P	C00442	58459-37-3
r5p	alpha-D-Ribose 5-phosphate	C5H9O8P	-2	C5H11O8P	C00117	4300-28-1
nh4	Ammonium	H4N	1	H3N	C01342	14798-03-9
amp	AMP	C10H12N5O7P	-2	C10H14N5O7P	C00020	61-19-8
arbt	Arbutin	C12H16O7	0		C06186
arbt6p	Arbutin 6-phosphate	C12H15O10P	-2	C12H17O10P	C06187
atp	ATP	C10H12N5O13P3	-4	C10H16N5O13P3	C00002	56-65-5
g6p-B	beta-D-glucose 6-phosphate	C6H11O9P	-2	C6H13O9P
butpi	Butanoyl phosphate	C4H7O5P	-2	C4H9O5P	C02527
btcoa	Butanoyl-CoA	C25H38N7O17P3S	-4	C25H42N7O17P3S	C00136
but	Butyrate (n-C4:0)	C4H7O2	-1	C4H8O2	C00246	107-92-6
ca2	Calcium	Ca	2		C00076	7440-70-2
cdp	CDP	C9H12N3O11P2	-3	C9H15N3O11P2	C00112	63-38-7
cdpdag	CDPdiacylglycerol	C14H17N3O15P2R2	-2	C14H19N3O15P2R2	C00269
cellb	cellobiose	C12H22O11	0		C00185
cl	Chloride	Cl	-1		C00115
chol	Choline	C5H14NO	1		C00114	123-41-1
cholp	Choline phosphate	C5H13NO4P	-1	C5H15NO4P	C00588
cmp	CMP	C9H12N3O8P	-2	C9H14N3O8P	C00055
co2	CO2	CO2	0		C00011	124-38-9
cobalt2	Co2+	Co	2		C00175	7440-48-4
coa	Coenzyme A	C21H32N7O16P3S	-4	C21H36N7O16P3S	C00010	85-61-0
ctp	CTP	C9H12N3O14P3	-4	C9H16N3O14P3	C00063	65-47-4
cu2	Cu2+	Cu	2
cgly	Cys-Gly	C5H10N2O3S	0		C01419	19246-18-5
cytd	Cytidine	C9H13N3O5	0		C00475	65-46-3
csn	Cytosine	C4H5N3O	0		C00380	71-30-7
dadp	dADP	C10H12N5O9P2	-3	C10H15N5O9P2	C00206
damp	dAMP	C10H12N5O6P	-2	C10H14N5O6P	C00360	653-63-4
datp	dATP	C10H12N5O12P3	-4	C10H16N5O12P3	C00131	1927-31-7
dcdp	dCDP	C9H12N3O10P2	-3	C9H15N3O10P2	C00705
dcmp	dCMP	C9H12N3O7P	-2	C9H14N3O7P	C00239	1032-65-1
dctp	dCTP	C9H12N3O13P3	-4	C9H16N3O13P3	C00458	2056-98-6
dnad	Deamino-NAD+	C21H24N6O15P2	-2	C21H27N6O15P2	C00857
dad-2	Deoxyadenosine	C10H13N5O3	0		C00559	958-09-8
dcyt	Deoxycytidine	C9H13N3O4	0		C00881	951-77-9
dgsn	Deoxyguanosine	C10H13N5O4	0		C00330	961-07-9
din	Deoxyinosine	C10H12N4O4	0		C05512	890-38-0
duri	Deoxyuridine	C9H12N2O5	0		C00526	951-78-0
e4p	D-Erythrose 4-phosphate	C4H7O7P	-2	C4H9O7P	C00279	585-18-2
fru	D-Fructose	C6H12O6	0		C00095	57-48-7
fdp	D-Fructose 1,6-bisphosphate	C6H10O12P2	-4	C6H14O12P2	C00354	488-69-7
f1p	D-Fructose 1-phosphate	C6H11O9P	-2	C6H13O9P	C02976	15978-08-2
f6p	D-Fructose 6-phosphate	C6H11O9P	-2	C6H13O9P	C00085	643-13-0
gal	D-Galactose	C6H12O6	0		C00124	59-23-4
dgdp	dGDP	C10H12N5O10P2	-3		C00361
gam	D-Glucosamine	C6H14NO5	1	C6H13NO5	C00329	3416-24-8
gam1p	D-Glucosamine 1-phosphate	C6H13NO8P	-1	C6H14NO8P	C06156
gam6p	D-Glucosamine 6-phosphate	C6H13NO8P	-1	C6H14NO8P	C00352	3616-42-0
glc-D	D-Glucose	C6H12O6	0		C00031	50-99-7
g1p	D-Glucose 1-phosphate	C6H11O9P	-2	C6H13O9P	C00103	59-56-3
g6p	D-Glucose 6-phosphate	C6H11O9P	-2	C6H13O9P	C00092	56-73-5
glyald	D-Glyceraldehyde	C3H6O3	0		C00577	453-17-8
2pg	D-Glycerate 2-phosphate	C3H4O7P	-3	C3H7O7P	C00631
dgmp	dGMP	C10H12N5O7P	-2	C10H14N5O7P	C00362	902-04-5
dgtp	dGTP	C10H12N5O13P3	-4	C10H16N5O13P3	C00286	2564-35-4
d12dg	diglucosyl-1,2 diacylglycerol	C4636H8672O1500	0		C06040
dhap	Dihydroxyacetone phosphate	C3H5O6P	-2	C3H7O6P	C00111	1957-04-05
ppi	Diphosphate	HO7P2	-3	H4O7P2	C00013	2466-09-03
ditp	dITP	C10H11N4O13P3	-4	C10H15N4O13P3	C01345
mnl	D-Mannitol	C6H14O6	0		C00392	69-65-8
mnl1p	D-Mannitol 1-phosphate	C6H13O9P	-2	C6H15O9P	C00644
man	D-Mannose	C6H12O6	0		C00159	3458-28-4
man1p	D-Mannose 1-phosphate	C6H11O9P	-2	C6H13O9P	C03812
man6p	D-Mannose 6-phosphate	C6H11O9P	-2	C6H13O9P	C00275
rib-D	D-Ribose	C5H10O5	0		C00121	50-69-1
ru5p-D	D-Ribulose 5-phosphate	C5H9O8P	-2	C5H11O8P	C00199	4151-19-3
dtdp	dTDP	C10H13N2O11P2	-3	C10H16N2O11P2	C00363
dtmp	dTMP	C10H13N2O8P	-2	C10H15N2O8P	C00364	365-07-1
dttp	dTTP	C10H13N2O14P3	-4	C10H17N2O14P3	C00459
dudp	dUDP	C9H11N2O11P2	-3	C9H14N2O11P2	C01346
dump	dUMP	C9H11N2O8P	-2	C9H13N2O8P	C00365	964-26-1
dutp	dUTP	C9H11N2O14P3	-4	C9H15N2O14P3	C00460
xu5p-D	D-Xylulose 5-phosphate	C5H9O8P	-2	C5H11O8P	C00231
fe2	Fe2+	Fe	2		C00023
fe3	Fe3+	Fe	3
fad	Flavin adenine dinucleotide oxidized	C27H31N9O15P2	-2	C27H33N9O15P2	C00016	146-14-5
fmn	FMN	C17H19N4O9P	-2	C17H21N4O9P	C00061	146-17-8
fol	Folate	C19H18N7O6	-1	C19H19N7O6	C00504
gdp	GDP	C10H12N5O11P2	-3	C10H15N5O11P2	C00035	146-91-8
g3p	Glyceraldehyde 3-phosphate	C3H5O6P	-2	C3H7O6P	C00661	142-10-9
glyc	Glycerol	C3H8O3	0		C00116	56-81-5
glyc3p	Glycerol 3-phosphate	C3H7O6P	-2	C3H9O6P	C00093
gly	Glycine	C2H5NO2	0	C2H5NO2	C00037	56-40-6
gly-asn-L	glycyl-L-asparagine	C6H11N3O4	0	C6H11N3O4
gly-glu-L	glycyl-L-glutamic acid	C7H11N2O5	-1	C7H12N2O5
glytrna	Glycyl-tRNA(Gly)	C2H4NOR	1		C02412
gmp	GMP	C10H12N5O8P	-2		C00144	85-32-5
gtp	GTP	C10H12N5O14P3	-4	C10H16N5O14P3	C00044	1986-01-01
gua	Guanine	C5H5N5O	0		C00242	73-40-5
gsn	Guanosine	C10H13N5O5	0		C00387	118-00-3
h	H+	H	1		C00080	12408-02-5
h2o	H2O	H2O	0		C00001	7732-18-5
h2o2	Hydrogen peroxide	H2O2	0		C00027	7722-84-1
hxan	Hypoxanthine	C5H4N4O	0		C00262	68-94-0
idp	IDP	C10H11N4O11P2	-3	C10H14N4O11P2	C00104	1986-04-04
imp	IMP	C10H11N4O8P	-2	C10H13N4O8P	C00130	131-99-7
pppi	Inorganic triphosphate	HO10P3	-4	H5O10P3	C03279
ins	Inosine	C10H12N4O5	0		C00294	58-63-9
itp	ITP	C10H11N4O14P3	-4	C10H15N4O14P3	C00081	132-06-9
ala-L	L-Alanine	C3H7NO2	0	C3H7NO2	C00041	56-41-7
L-alagly	L-alanylglycine	C5H10N2O3	0	C5H10N2O3
ala-L-asp-L	L-alanyl-L-aspartate	C7H11N2O5	-1	C7H12N2O5
alatrna	L-Alanyl-tRNA(Ala)	C3H6NOR	1		C00886
arg-L	L-Arginine	C6H15N4O2	1	C6H14N4O2	C00062	74-79-3
argtrna	L-Arginyl-tRNA(Arg)	C6H14N4OR	2		C02163
asn-L	L-Asparagine	C4H8N2O3	0	C4H8N2O3	C00152	70-47-3
asntrna	L-Asparaginyl-tRNA(Asn)	C4H7N2O2R	1		C03402
asp-L	L-Aspartate	C4H6NO4	-1	C4H7NO4	C00049	56-84-8
asptrna	L-Aspartyl-tRNA(Asp)	C4H5NO3R	0		C02984
cys-L	L-Cysteine	C3H7NO2S	0	C3H7NO2S	C00097	52-90-4
cystrna	L-Cysteinyl-tRNA(Cys)	C3H6NOSR	1		C03125
glu-L	L-Glutamate	C5H8NO4	-1	C5H9NO4	C00025	56-86-0
gln-L	L-Glutamine	C5H10N2O3	0	C5H10N2O3	C00064	56-85-9
glntrna	L-Glutaminyl-tRNA(Gln)	C5H9N2O2R	1		C02282
glutrna	L-Glutamyl-tRNA(Glu)	C5H7NO3R	0	C5H7NO3R	C02987
gly-gln-L	L-Glycylglutamine	C7H13N3O4	0	C7H13N3O4
his-L	L-Histidine	C6H9N3O2	0	C6H9N3O2	C00135	71-00-1
histrna	L-Histidyl-tRNA(His)	C6H8N3OR	1		C02988
ile-L	L-Isoleucine	C6H13NO2	0	C6H13NO2	C00407	73-32-5
iletrna	L-Isoleucyl-tRNA(Ile)	C6H12NOR	1		C03127
lac-L	L-Lactate	C3H5O3	-1	C3H6O3	C00186	79-33-4
leu-L	L-Leucine	C6H13NO2	0	C6H13NO2	C00123	61-90-5
leutrna	L-Leucyl-tRNA(Leu)	C6H12NOR	1		C02047
lys-L	L-Lysine	C6H15N2O2	1	C6H14N2O2	C00047	56-87-1
lystrna	L-Lysine-tRNA (Lys)	C6H14N2OR	2		C01931
met-L	L-Methionine	C5H11NO2S	0	C5H11NO2S	C00073	63-68-3
metox-R	L-methionine R-oxide	C5H11NO3S	0
metox	L-Methionine S-oxide	C5H11NO3S	0		C02989
mettrna	L-Methionyl-tRNA (Met)	C5H10NOSR	1		C02430
orn-L	L-Ornithine	C5H13N2O2	1	C5H12N2O2	C01602, C00077
phe-L	L-Phenylalanine	C9H11NO2	0	C9H11NO2	C00079	63-91-2
phetrna	L-Phenylalanyl-tRNA(Phe)	C9H10NOR	1		C03511
pro-L	L-Proline	C5H9NO2	0	C5H9NO2	C00148	147-85-3
gly-pro-L	L-Proline, 1-glycyl-	C7H12N2O3	0
protrna	L-Prolyl-tRNA(Pro)	C5H8NOR	1		C02702
ser-L	L-Serine	C3H7NO3	0	C3H7NO3	C00065	56-45-1
sertrna	L-Seryl-tRNA(Ser)	C3H6NO2R	1		C02553
thr-L	L-Threonine	C4H9NO3	0	C4H9NO3	C00188	72-19-5
thrtrna	L-Threonyl-tRNA(Thr)	C4H8NO2R	1		C02992
trp-L	L-Tryptophan	C11H12N2O2	0	C11H12N2O2	C00078	73-22-3
trptrna	L-Tryptophanyl-tRNA(Trp)	C11H11N2OR	1		C03512
tyr-L	L-Tyrosine	C9H11NO3	0	C9H11NO3	C00082	60-18-4
tyrtrna	L-Tyrosyl-tRNA(Tyr)	C9H10NO2R	1		C02839
val-L	L-Valine	C5H11NO2	0	C5H11NO2	C00183	72-18-4
valtrna	L-Valyl-tRNA(Val)	C5H10NOR	1		C02554
mg2	Magnesium	Mg	2	Mg	C00305
msa	Malonate semialdehyde	C3H3O3	-1	C3H4O3	C00222
malt	Maltose	C12H22O11	0		C00208	69-79-4
malt6p	Maltose 6'-phosphate	C12H21O14P	-2	C12H23O14P	C02995
mql7	Menaquinol 7	C46H66O2	0		C05819
mqn7	Menaquinone 7	C46H64O2	0		C00828
met-L-ala-L	met-L-ala-L	C8H16N2O3S	0
tcam	minor teichoic acid (acetylgalactosamine glucose phosphate, n=30)	C420H750N30O420P30	-30	C420H780N30O420P30
mn2	Mn2+	Mn	2		C00034
mobd	Molybdate	MoO4	-2	H2MoO4	C06232
m12dg	monoglucosyl-1,2 diacylglycerol	C4036H7672O1000	0		C04046
inost	myo-Inositol	C6H12O6	0		C00137	87-89-8
C03153	N5-Methyl-L-glutamine	C6H12N2O3	-1	C6H13N2O3	C03153
acgam	N-Acetyl-D-glucosamine	C8H15NO6	0		C00140	7512-17-6
acgam1p	N-Acetyl-D-glucosamine 1-phosphate	C8H14NO9P	-2	C8H16NO9P	C04256
acgam6p	N-Acetyl-D-glucosamine 6-phosphate	C8H14NO9P	-2	C8H16NO9P	C00357	102029-88-9
fmettrna	N-Formylmethionyl-tRNA	C6H9NO2SR	0		C03294
gly-asp-L	N-glycyl-L-aspartic acid	C6H9N2O5	-1	C6H10N2O5
gly-met-L	N-Glycyl-L-methionine	C7H14N2O3S	0	C7H14N2O3S
ni2	Nickel	Ni	2		C00291
nad	Nicotinamide adenine dinucleotide	C21H26N7O14P2	-1	C21H28N7O14P2	C00003	53-84-9
nadh	Nicotinamide adenine dinucleotide - reduced	C21H27N7O14P2	-2	C21H29N7O14P2	C00004	58-68-4
nadp	Nicotinamide adenine dinucleotide phosphate	C21H25N7O17P3	-3		C00006	53-59-8
nadph	Nicotinamide adenine dinucleotide phosphate - reduced	C21H26N7O17P3	-4	C21H30N7O17P3	C00005	2646-71-1
nac	Nicotinate	C6H4NO2	-1	C6H5NO2	C00253	59-67-6
nicrnt	Nicotinate D-ribonucleotide	C11H12NO9P	-2	C11H15NO9P	C01185
ala-L-leu-L	N-L-Alanyl-L-leucine	C9H18N2O3	0	C9H18N2O3
ala-L-thr-L	N-L-alanyl-L-threonine	C7H14N2O4	0	C7H14N2O4
nmn	NMN	C11H14N2O8P	-1		C00455	1094-61-7
trdox	Oxidized thioredoxin	C6H7NO2S2R2	0		C00343
pi	Phosphate	HO4P	-2	H3O4P	C00009	14265-44-2
pglyp	Phosphatidylglycerophosphate	C8H11O13P2R2	-3	C8H14O13P2R2	C03892
pep	Phosphoenolpyruvate	C3H2O6P	-3	C3H5O6P	C00074	138-08-9
k	Potassium	K	1		C00238
ppap	Propanoyl phosphate	C3H5O5P	-2		C02876
ppcoa	Propanoyl-CoA	C24H36N7O17P3S	-4	C24H40N7O17P3S	C00100	317-66-8
ppa	Propionate (n-C3:0)	C3H5O2	-1	C3H6O2	C00163	1979-09-04
psd5p	Pseudouridine 5'-phosphate	C9H11N2O9P	-2	C9H13N2O9P	C01168
ptrc	Putrescine	C4H14N2	2	C4H12N2	C00134	110-60-1
pydx	Pyridoxal	C8H9NO3	0	C8H9NO3	C00250	66-72-8
pydx5p	Pyridoxal 5'-phosphate	C8H8NO6P	-2	C8H10NO6P	C00018	54-47-7
pyr	Pyruvate	C3H3O3	-1	C3H4O3	C00022	127-17-3
trdrd	Reduced thioredoxin	C6H9NO2S2R2	0		C00342
ribflv	Riboflavin	C17H20N4O6	0		C00255	83-88-5
ahcys	S-Adenosyl-L-homocysteine	C14H20N6O5S	0	C14H20N6O5S	C00021	979-92-0
amet	S-Adenosyl-L-methionine	C15H23N6O5S	1	C15H23N6O5S	C00019	29908-03-0
salcn	Salicin	C13H18O7	0		C01451
salc6p	Salicin 6-phosphate	C13H17O10P	-2	C13H19O10P	C06188
s7p	Sedoheptulose 7-phosphate	C7H13O10P	-2	C7H15O10P	C00281
spmd	Spermidine	C7H22N3	3	C7H19N3	C00315	124-20-9
succoa	Succinyl-CoA	C25H35N7O19P3S	-5	C25H40N7O19P3S	C00091	604-98-8
sucr	Sucrose	C12H22O11	0		C00089	57-50-1
suc6p	Sucrose 6-phosphate	C12H21O14P	-2	C12H23O14P	C02591
so4	Sulfate	O4S	-2	H2O4S	C00059	7664-93-9
teich-45	teichuronic acid (GlcA + GalNac, 45 repeating unit)	C630H945N45O630P45	-45
thm	Thiamin	C12H17N4OS	1	C12H17N4OS	C00378	1967-03-08
thmpp	Thiamine diphosphate	C12H16N4O7P2S	-2	C12H19N4O7P2S	C00068	154-87-0
thymd	Thymidine	C10H14N2O5	0		C00214	50-89-5
thym	Thymine	C5H6N2O2	0		C00178	65-71-4
tre	Trehalose	C12H22O11	0		C01083	99-20-7
t12dg	triglucosyl-1,2 diacylglycerol	C5236H9672O2000	0		C06041
trnaglu	tRNA (Glu)	HOR	0		C01641
trnaala	tRNA(Ala)	HOR	0		C01635
trnaarg	tRNA(Arg)	HOR	0		C01636
trnaasn	tRNA(Asn)	HOR	0		C01637
trnaasp	tRNA(Asp)	HOR	0		C01638
trnacys	tRNA(Cys)	HOR	0		C01639
trnagly	tRNA(Gly)	HOR	0		C01642
trnahis	tRNA(His)	HOR	0		C01643
trnaile	tRNA(Ile)	HOR	0		C01644
trnaleu	tRNA(Leu)	HOR	0		C01645
trnalys	tRNA(Lys)	HOR	0		C01646
trnamet	tRNA(Met)	HOR	0		C01647
trnaphe	tRNA(Phe)	HOR	0		C01648
trnapro	tRNA(Pro)	HOR	0		C01649
trnaser	tRNA(Ser)	HOR	0		C01650
trnathr	tRNA(Thr)	HOR	0		C01651
trnatrp	tRNA(Trp)	HOR	0		C01652
trnatyr	tRNA(Tyr)	HOR	0		C00787
trnaval	tRNA(Val)	HOR	0		C01653
udp	UDP	C9H11N2O12P2	-3	C9H14N2O12P2	C00015	58-98-0
udpgalfur	UDP-D-galacto-1,4-furanose	C15H22N2O17P2	-2	C15H24N2O17P2	C03733	638-23-3
udpglcur	UDP-D-glucuronate	C15H19N2O18P2	-3	C15H22N2O18P2	C00167
udpgal	UDPgalactose	C15H22N2O17P2	-2	C15H24N2O17P2	C00052
udpg	UDPglucose	C15H22N2O17P2	-2	C15H24N2O17P2	C00029
uacgala	UDP-N-acetyl-D-galactosamine	C17H25N3O17P2	-2	C17H27N3O17P2	C00203
uacgam	UDP-N-acetyl-D-glucosamine	C17H25N3O17P2	-2	C17H27N3O17P2	C00043
ump	UMP	C9H11N2O9P	-2	C9H13N2O9P	C00105	58-97-9
ura	Uracil	C4H4N2O2	0		C00106	66-22-8
uri	Uridine	C9H12N2O6	0		C00299	58-96-8
utp	UTP	C9H11N2O15P3	-4	C9H15N2O15P3	C00075	63-39-8
xan	Xanthine	C5H4N4O2	0		C00385	69-89-6
xtsn	Xanthosine	C10H12N4O6	0		C01762	146-80-5
xtp	XTP	C10H11N4O15P3	-4	C10H15N4O15P3	C00700
zn2	Zinc	Zn	2		C00038	7440-66-6

## Sheet: rxn & GPR
Abbreviation	Name	Equation (note [c] and [e] at the beginning refer to the compartment the reaction takes place in, cytosolic and extracellular respectively)	Subsystem	Protein Classification	Locus name
ACGApts	N-Acetyl-D-glucosamine transport via PEP:Pyr PTS	acgam[e] + pep[c] --> acgam6p[c] + pyr[c]	Transport		MG041 and MG429
ACKr	acetate kinase	[c] : ac + atp <==> actp + adp	Carbohydrates and related molecules	EC-2.7.2.1	MG357
ACOAt	Acyl Coenzyme A transport	acoa[e] --> acoa[c]	Transport
ACt6	acetate transport in/out via proton symport	ac[e] + h[e] <==> ac[c] + h[c]	Transport	TC-2.A.1.13
ADEt2	adenine transport via proton symport (reversible)	ade[e] + h[e] <==> ade[c] + h[c]	Transport
ADK1	adenylate kinase	[c] : amp + atp <==> (2) adp	Nucleotide Metabolism	EC-2.7.4.3	MG171
ADK2	adenylate kinase (Inorganic triphosphate)	[c] : amp + pppi <==> adp + ppi	Nucleotide Metabolism	EC-2.7.4.3	MG171
ADPT	adenine phosphoribosyltransferase	[c] : ade + prpp --> amp + ppi	Nucleotide Metabolism	EC-2.4.2.7	MG276
AGPAT	1-acylglycerol-3-phosphate O-acyltransferase	[c] : 1ag3p + acoa --> 12dag3p + coa	Lipid & Cell Membrane Metabolism	EC-2.3.1.51	MG212
AKGD	2-oxoglutarate dehydrogenase	[c] : akg + coa + nad --> co2 + nadh + succoa	Carbohydrates and related molecules		MG271
AKGt2	2-oxoglutarate transport in via proton symport	akg[e] + h[e] --> akg[c] + h[c]	Transport	TC-2.A.1.6
ALATRS	Alanyl-tRNA synthetase	[c] : ala-L + atp + trnaala --> alatrna + amp + ppi	Alanine Metabolism	EC-6.1.1.7	MG292
ALDD2x	aldehyde dehydrogenase (acetaldehyde, NAD)	[c] : acald + h2o + nad <==> ac + (2) h + nadh	Carbohydrates and related molecules	EC-1.2.1.3
ALDD2y	aldehyde dehydrogenase (acetaldehyde, NADP)	[c] : acald + h2o + nadp <==> ac + (2) h + nadph	Carbohydrates and related molecules	EC-1.2.1.4
AMPEP1	aminopeptidase	[c] : ala-L-asp-L + h2o <==> ala-L + asp-L	Amino acids and related molecules
AMPEP10	aminopeptidase	[c] : gly-glu-L + h2o <==> gly + glu-L	Amino acids and related molecules
AMPEP11	aminopeptidase	[c] : gly-met-L + h2o <==> gly + met-L	Amino acids and related molecules
AMPEP12	aminopeptidase	[c] : h2o + met-L-ala-L <==> met-L + ala-L	Amino acids and related molecules
AMPEP13	aminopeptidase	[c] : gly-asp-L + h2o <==> gly + asp-L	Amino acids and related molecules
AMPEP14	aminopeptidase	[c] : gly-pro-L + h2o <==> gly + pro-L	Amino acids and related molecules
AMPEP2	aminopeptidase	[c] : ala-L-gln-L + h2o <==> ala-L + gln-L	Amino acids and related molecules
AMPEP3	aminopeptidase	[c] : ala-L-glu-L + h2o <==> ala-L + glu-L	Amino acids and related molecules
AMPEP4	aminopeptidase	[c] : L-alagly + h2o <==> ala-L + gly	Amino acids and related molecules
AMPEP5	aminopeptidase	[c] : ala-L-his-L + h2o <==> ala-L + his-L	Amino acids and related molecules
AMPEP6	aminopeptidase	[c] : ala-L-leu-L + h2o <==> ala-L + leu-L	Amino acids and related molecules
AMPEP7	aminopeptidase	[c] : ala-L-thr-L + h2o <==> ala-L + thr-L	Amino acids and related molecules
AMPEP8	aminopeptidase	[c] : gly-asn-L + h2o <==> gly + asn-L	Amino acids and related molecules
AMPEP9	aminopeptidase	[c] : gly-gln-L + h2o <==> gly + gln-L	Amino acids and related molecules
ARBTpts	arbutin transport via PEP:Pyr PTS	arbt[e] + pep[c] --> arbt6p[c] + pyr[c]	Transport		MG041 and MG429
ARGt2	L-arginine transport in via proton symport	arg-L[e] + h[e] --> arg-L[c] + h[c]	Transport
ARGTRS	Arginyl-tRNA synthetase	[c] : arg-L + atp + trnaarg --> amp + argtrna + ppi	Amino acids and related molecules	EC-6.1.1.19	MG378
ASNt2	L-asparagine transport in via proton symport	asn-L[e] + h[e] --> asn-L[c] + h[c]	Transport
ASNTRS	Asparaginyl-tRNA synthetase	[c] : asn-L + atp + trnaasn --> amp + asntrna + ppi	tRNA Charging	EC-6.1.1.22	MG113
ASPTRS	Aspartyl-tRNA synthetase	[c] : asp-L + atp + trnaasp --> amp + asptrna + ppi	tRNA Charging	EC-6.1.1.12	MG036
ATPHs	ATP amine hydrolysis (spontaneous)	[c] : atp + h + h2o --> itp + nh4	Nucleotide Salvage Pathway		s0001
ATPM	ATP maintenance requirement	[c] : atp + h2o --> adp + h + pi	Unassigned
ATPS4r	ATP synthase (four protons for one ATP)	adp[c] + (4) h[e] + pi[c] <==> atp[c] + (3) h[c] + h2o[c]	Oxidative Phosphorylation	EC-3.6.3.14,	MG399 and MG400 and MG401 and MG402 and MG403 and MG404 and MG405
CA2abc	calcium efflux via ABC system	atp[c] + ca2[e] + h2o[c] --> adp[c] + ca2[c] + h[c] + pi[c]	Transport		MG071
CDGPT	CDPdiacylglycerol:sn-glycerol-3-phosphate 3-phosphatidyltransferase	[c] : cdpdag + glyc3p --> cmp + h + pglyp	Lipid & Cell Membrane Metabolism	EC-2.7.8.5	MG114
CELBpts	cellobiose transport via PEP:Pyr PTS	cellb[e] + pep[c] --> 6pgg[c] + pyr[c]	Transport		MG041 and MG429
CHOLK	Choline kinase	[c] : atp + chol --> adp + cholp + h	Cell Envelope Biosynthesis	EC-2.7.1.32	MG356
Clt	chlorideion transport out via diffusion	cl[e] <==> cl[c]	Transport	TC-1.A.11
CO2t	CO2 transporter via diffusion	co2[e] <==> co2[c]	Transport		s0001
Coabc	Cobalt transport via ABC system	atp[c] + cobalt2[e] + h2o[c] --> adp[c] + cobalt2[c] + h[c] + pi[c]	Transport		MG179 and MG180 and MG181
COAt	Coenzyme A transport	coa[e] --> coa[c]	Transport
CSNt2	cytosine transport in via proton symport	csn[e] + h[e] --> csn[c] + h[c]	Transport
Cuabc	Copper transport via ABC system	atp[c] + cu2[e] + h2o[c] --> adp[c] + cu2[c] + h[c] + pi[c]	Transport	TC-3.A.3
CYSTRS	Cysteinyl-tRNA synthetase	[c] : atp + cys-L + trnacys --> amp + cystrna + ppi	tRNA Charging	EC-6.1.1.16	MG253
CYTD	cytidine deaminase	[c] : cytd + h + h2o --> nh4 + uri	Purine and Pyrimidine Biosynthesis	EC-3.5.4.5	MG052
CYTDK1	cytidine kinase (ATP)	[c] : atp + cytd --> adp + cmp + h	Nucleotides and nucleic acids		MG382
CYTDK2	cytidine kinase (GTP)	[c] : cytd + gtp --> cmp + gdp + h	Nucleotides and nucleic acids		MG382
CYTDK3	cytidine kinase (ITP)	[c] : cytd + itp --> cmp + h + idp	Nucleotides and nucleic acids		MG382
CYTK1	cytidylate kinase (CMP)	[c] : atp + cmp <==> adp + cdp	Nucleotides and nucleic acids	EC-2.7.4.14	MG330
CYTK2	cytidylate kinase (dCMP)	[c] : atp + dcmp <==> adp + dcdp	Nucleotides and nucleic acids	EC-2.7.4.14	MG330
DADK	deoxyadenylate kinase	[c] : atp + damp <==> adp + dadp	Nucleotide Metabolism	EC-2.7.4.11	MG171
DATPHs	dATP amine hydrolysis (spontaneous)	[c] : datp + h + h2o --> ditp + nh4	Nucleotide Salvage Pathway		s0001
DATPt	Dinucleoside transport (dATP)	datp[e] --> datp[c]	Transport
DCYTD	deoxycytidine deaminase	[c] : dcyt + h + h2o --> duri + nh4	Nucleotide Salvage Pathways	EC-3.5.4.14	MG052
DGK1	deoxyguanylate kinase (dGMP:ATP)	[c] : atp + dgmp <==> adp + dgdp	Nucleotides and nucleic acids		MG107
DGTPt	Dinucleoside transport (dGTP)	dgtp[e] --> dgtp[c]	Transport
DHFOR2	dihydrofolate reductase	[c] : dhf + nadp <==> fol + nadph	Vitamins & Cofactor Biosynthesis	EC-1.5.1.3	MG228
DHFOR3	dihydrofolate reductase	[c] : fol + h + (2) nadph <==> (2) nadp + thf	Vitamins & Cofactor Biosynthesis	EC-1.5.1.3	MG228
DHFR	dihydrofolate reductase	[c] : dhf + h + nadph <==> nadp + thf	Vitamins & Cofactor Biosynthesis	EC-1.5.1.3	MG228
DIPEPabc1	Dipeptide transport via ABC system (ala-asp)	ala-L-asp-L[e] + atp[c] + h2o[c] --> adp[c] + ala-L-asp-L[c] + h[c] + pi[c]	Transport	TC-3.A.1.5	MG077 and MG078 and MG079 and MG080
DIPEPabc10	Dipeptide transport via ABC system (gly-glu)	atp[c] + gly-glu-L[e] + h2o[c] --> adp[c] + gly-glu-L[c] + h[c] + pi[c]	Transport	TC-3.A.1.5	MG077 and MG078 and MG079 and MG080
DIPEPabc11	Dipeptide transport via ABC system (gly-met)	atp[c] + gly-met-L[e] + h2o[c] --> adp[c] + gly-met-L[c] + h[c] + pi[c]	Transport	TC-3.A.1.5	MG077 and MG078 and MG079 and MG080
DIPEPabc12	Dipeptide transport via ABC system (met-ala)	atp[c] + h2o[c] + met-L-ala-L[e] --> adp[c] + h[c] + met-L-ala-L[c] + pi[c]	Transport	TC-3.A.1.5	MG077 and MG078 and MG079 and MG080
DIPEPabc13	Dipeptide transport via ABC system (gly-asp)	atp[c] + gly-asp-L[e] + h2o[c] --> adp[c] + gly-asp-L[c] + h[c] + pi[c]	Transport	TC-3.A.1.5	MG077 and MG078 and MG079 and MG080
DIPEPabc14	Dipeptide transport via ABC system (gly-pro-L)	atp[c] + gly-pro-L[e] + h2o[c] --> adp[c] + gly-pro-L[c] + h[c] + pi[c]	Transport	TC-3.A.1.5	MG077 and MG078 and MG079 and MG080
DIPEPabc15	Dipeptide transport via ABC system (cgly)	atp[c] + cgly[e] + h2o[c] --> adp[c] + cgly[c] + h[c] + pi[c]	Transport	TC-3.A.1.5	MG077 and MG078 and MG079 and MG080
DIPEPabc2	Dipeptide transport via ABC system (ala-gln)	ala-L-gln-L[e] + atp[c] + h2o[c] --> adp[c] + ala-L-gln-L[c] + h[c] + pi[c]	Transport	TC-3.A.1.5	MG077 and MG078 and MG079 and MG080
DIPEPabc3	Dipeptide transport via ABC system (ala-glu)	ala-L-glu-L[e] + atp[c] + h2o[c] --> adp[c] + ala-L-glu-L[c] + h[c] + pi[c]	Transport	TC-3.A.1.5	MG077 and MG078 and MG079 and MG080
DIPEPabc4	Dipeptide transport via ABC system (ala-gly)	L-alagly[e] + atp[c] + h2o[c] --> L-alagly[c] + adp[c] + h[c] + pi[c]	Transport	TC-3.A.1.5	MG077 and MG078 and MG079 and MG080
DIPEPabc5	Dipeptide transport via ABC system (ala-his)	ala-L-his-L[e] + atp[c] + h2o[c] --> adp[c] + ala-L-his-L[c] + h[c] + pi[c]	Transport	TC-3.A.1.5	MG077 and MG078 and MG079 and MG080
DIPEPabc6	Dipeptide transport via ABC system (ala-leu)	ala-L-leu-L[e] + atp[c] + h2o[c] --> adp[c] + ala-L-leu-L[c] + h[c] + pi[c]	Transport	TC-3.A.1.5	MG077 and MG078 and MG079 and MG080
DIPEPabc7	Dipeptide transport via ABC system (ala-thr)	ala-L-Thr-L[e] + atp[c] + h2o[c] --> adp[c] + ala-L-Thr-L[c] + h[c] + pi[c]	Transport	TC-3.A.1.5	MG077 and MG078 and MG079 and MG080
DIPEPabc8	Dipeptide transport via ABC system (gly-asn)	atp[c] + gly-asn-L[e] + h2o[c] --> adp[c] + gly-asn-L[c] + h[c] + pi[c]	Transport	TC-3.A.1.5	MG077 and MG078 and MG079 and MG080
DIPEPabc9	Dipeptide transport via ABC system (gly-gln)	atp[c] + gly-gln-L[e] + h2o[c] --> adp[c] + gly-gln-L[c] + h[c] + pi[c]	Transport	TC-3.A.1.5	MG077 and MG078 and MG079 and MG080
DM_C03153	N5-Methyl-L-glutamine drain	C03153[c] -->
DM_pglyp	Phosphatidylglycerophosphate drain	pglyp[c] -->
DRPAr	Deoxyribose-phosphate aldolase	[c] : 2dr5p <==> acald + g3p	Nucleotides and nucleic acids	EC-4.1.2.4	MG050
DTMPK	dTMP kinase	[c] : atp + dtmp <==> adp + dtdp	Nucleotides and nucleic acids	EC-2.7.4.9	MG006
DURIPP	purine-nucleoside phosphatase (deoxyuridine)	[c] : duri + pi <==> 2dr1p + ura	Nucleotides and nucleic acids	EC-2.4.2.2	MG051
DXPS	1-deoxy-D-xylulose 5-phosphate synthase	[c] : g3p + h + pyr --> co2 + dxyl5p	Carbohydrates and related molecules		MG066
ENO	enolase	[c] : 2pg <==> h2o + pep	Central Metabolism	EC-4.2.1.11	MG407
F1PK	fructose-1-phosphate kinase	[c] : atp + f1p --> adp + fdp + h	Carbohydrates and related molecules	EC-2.7.1.56	MG063
FBA	fructose-bisphosphate aldolase	[c] : fdp <==> dhap + g3p	Carbohydrates and related molecules	EC-4.1.2.13	MG023
FBA2	D-Fructose 1-phosphate D-glyceraldehyde-3-phosphate-lyase	[c] : f1p <==> dhap + glyald	Carbohydrates and related molecules	EC-4.1.2.13	MG023
FE2abc	iron (II) transport via ABC system	atp[c] + fe2[e] + h2o[c] --> adp[c] + fe2[c] + h[c] + pi[c]	Transport
FE3abc	iron (III) transport via ABC system	atp[c] + fe3[e] + h2o[c] --> adp[c] + fe3[c] + h[c] + pi[c]	Transport
FMETTRS	Methionyl-tRNA formyltransferase	[c] : 10fthf + mettrna --> fmettrna + thf	Amino acids and related molecules	EC-2.1.2.9	MG365
FMNATr	FMN adenylyltransferase	[c] : atp + fmn + h <==> fad + ppi	Coenzymes and prosthetic groups	EC-2.7.7.2	MG145
FOLt	folate transport via proton simport	fol[e] + h[e] <==> fol[c] + h[c]	Transport
FRUpts	D-fructose transport via PEP:Pyr PTS	fru[e] + pep[c] --> f1p[c] + pyr[c]	Transport		MG429 and MG062 and MG041
G1PACT	glucosamine-1-phosphate N-acetyltransferase	[c] : accoa + gam1p --> acgam1p + coa + h	Lipid & Cell Membrane Metabolism	EC-2.3.1.157
G3PD4	glycerol-3-phosphate dehydrogenase (menaquinone 7)	[c] : glyc3p + mqn7 --> dhap + mql7	Carbohydrates and related molecules	EC-1.1.99.5	MG260
G3POA	glycerol-3-phosphate O-acyltransferase	[c] : glyc3p + acoa --> 1ag3p + coa	Lipid & Cell Membrane Metabolism	EC-2.3.1.15
G6PI	Glucose-6-phosphate isomerase	[c] : g6p <==> g6p-B	Carbohydrates and related molecules	EC-5.3.1.9	MG111
GALabc	D-galactose transport via ABC system	atp[c] + gal[e] + h2o[c] --> adp[c] + gal[c] + h[c] + pi[c]	Transport		MG119
GALU	UTP-glucose-1-phosphate uridylyltransferase	[c] : g1p + h + utp <==> ppi + udpg	Lipid & Cell Membrane Metabolism	EC-2.7.7.9	MG453
GAMpts	D-glucosamine transport via PEP:Pyr PTS	gam[e] + pep[c] --> gam6p[c] + pyr[c]	Transport		MG041 and MG429
GAPD	glyceraldehyde-3-phosphate dehydrogenase (NAD)	[c] : g3p + nad + pi <==> 13dpg + h + nadh	Central Metabolism	EC-1.2.1.12	MG301
GHMT	glycine hydroxymethyltransferase	[c] : ser-L + thf <==> gly + h2o + mlthf	Amino Acid Metabolism	EC-2.1.2.1	MG394
GK1	guanylate kinase (GMP:ATP)	[c] : atp + gmp <==> adp + gdp	Nucleotides and nucleic acids	EC-2.7.4.8	MG107
GK2	guanylate kinase (GMP:dATP)	[c] : datp + gmp <==> dadp + gdp	Nucleotides and nucleic acids	EC-2.7.4.8	MG107
GLCpts	D-glucose transport via PEP:Pyr PTS	glc-D[e] + pep[c] --> g6p[c] + pyr[c]	Transport		MG429 and MG069 and MG041
GLNMT	glutamine-N5 methyltransferase	[c] : gln-L + amet --> ahcys + C03153			MG259
GLUDy	glutamate dehydrogenase (NADP)	[c] : glu-L + h2o + nadp <==> akg + h + nadph + nh4	Amino acids and related molecules	EC-1.4.1.4
GLUt6	L-glutamate transport in/out via proton symporter	glu-L[e] + h[e] <==> glu-L[c] + h[c]	Transport	TC-2.A.23
GLUTRS	Glutamyl-tRNA synthetase	[c] : atp + glu-L + trnaglu --> amp + glutrna + ppi	Other function	EC-6.1.1.17	MG462
GLXAT	glutamyl-tRNA(Gln) amidotransferase	[c] : atp + gln-L + glutrna <==> glu-L + adp + glntrna + pi	Amino acids and related molecules		MG098 and MG099 and MG100
GLYC3Pabc	sn-Glycerol 3-phosphate transport via ABC system	atp[c] + glyc3p[e] + h2o[c] --> adp[c] + glyc3p[c] + h[c] + pi[c]	Transport		MG187 and MG188 and MG189
GLYCt	glycerol transport	glyc[c] <==> glyc[e]	Transport		MG033
GLYK	glycerol kinase	[c] : atp + glyc --> adp + glyc3p + h	Alternate Carbon Metabolism	EC-2.7.1.30	MG038
GLYTRS	Glycyl-tRNA synthetase	[c] : atp + gly + trnagly --> amp + glytrna + ppi	Glycine and Serine Metabolism	EC-6.1.1.14	MG251
GTPHs	GTP amine hydrolysis (spontaneous)	[c] : gtp + h + h2o --> nh4 + xtp	Nucleotide Salvage Pathway		s0001
GTPt	Nucleoside transport (GTP)	gtp[e] --> gtp[c]	Transport
GUAD	guanine deaminase	[c] : gua + h + h2o --> nh4 + xan	Nucleotides and nucleic acids	EC-3.5.4.3
GUAPRTr	guanine phosphoribosyltransferase	[c] : gua + prpp <==> gmp + ppi	Nucleotides and nucleic acids		MG458
H2Ot5	H2O transport via diffusion	h2o[e] <==> h2o[c]	Transport		s0001
HISt2	L-histidine transport in via proton symport	h[e] + his-L[e] --> h[c] + his-L[c]	Transport
HISTRS	Histidyl-tRNA synthetase	[c] : atp + his-L + trnahis --> amp + histrna + ppi	tRNA Charging	EC-6.1.1.21	MG035
HXPRTr	hypoxanthine phosphoribosyltransferase (Hypoxanthine)	[c] : hxan + prpp <==> imp + ppi	Nucleotides and nucleic acids	EC-2.4.2.8	MG458
ILEt2	L-isoleucine transport in via proton symport	h[e] + ile-L[e] --> h[c] + ile-L[c]	Transport
ILETRS	Isoleucyl-tRNA synthetase	[c] : atp + ile-L + trnaile --> amp + iletrna + ppi	Valine, Leucine, and Isoleucine Metabolism	EC-6.1.1.5	MG345
INS2D	inositol 2-dehydrogenase	[c] : inost + nad --> 2ins + h + nadh	Carbohydrates and related molecules	EC-1.1.1.18
INSCR	inositol catabolic reactions (lumped)	[c] : 2ins + atp --> adp + dhap + (2) h + msa	Carbohydrates and related molecules		MG023
INSK	inosine kinase	[c] : atp + ins --> adp + h + imp	Nucleotides and nucleic acids	EC-2.7.1.73
Kt2i	potassium irreversible transport via proton symporter	h[e] + k[e] --> h[c] + k[c]	Transport	TC-2.A.37	MG323
LDH_L	L-lactate dehydrogenase	[c] : lac-L + nad <==> h + nadh + pyr	Membrane bioenergetics	EC-1.1.1.27	MG460
LEUt6	L-leucine transport in/out via proton symport	h[e] + leu-L[e] <==> h[c] + leu-L[c]	Transport
LEUTRS	Leucyl-tRNA synthetase	[c] : atp + leu-L + trnaleu --> amp + leutrna + ppi	Valine, Leucine, and Isoleucine Metabolism	EC-6.1.1.4	MG266
L-LACt2	L-lactate reversible transport via proton symport	h[e] + lac-L[e] <==> h[c] + lac-L[c]	Transport
LYSt3	L-lysine transport out via proton antiport	h[e] + lys-L[c] --> h[c] + lys-L[e]	Transport
LYSTRS	Lysyl-tRNA synthetase	[c] : atp + lys-L + trnalys --> amp + lystrna + ppi	Threonine and Lysine Metabolism	EC-6.1.1.6	MG136
MALTpts	maltose transport via PEP:Pyr PTS	malt[e] + pep[c] --> malt6p[c] + pyr[c]	Transport		MG041 and MG429
MANpts	D-mannose transport via PEP:Pyr PTS	man[e] + pep[c] --> man6p[c] + pyr[c]	Transport		MG041 and MG429
METAT	methionine adenosyltransferase	[c] : atp + h2o + met-L --> amet + pi + ppi	Methionine Metabolism	EC-2.5.1.6	MG047
METSR-R1	L-methionine R-oxide reductase (trdrd)	[c] : metox-R + trdrd --> h2o + met-L + trdox	Amino acids and related molecules		MG448
METSR-R2	L-methionine R-oxide (H2O2)	[c] : h2o2 + met-L --> h2o + metox-R	Amino acids and related molecules		MG448
METSR-S1	L-methionine-S-oxide reductase (trdrd)	[c] : metox + trdrd --> h2o + met-L + trdox	Amino acids and related molecules		MG408
METSR-S2	L-methionine S-oxide reductase (H2O2)	[c] : h2o2 + met-L --> h2o + metox	Amino acids and related molecules		MG408
METt6	L-methionine transport in/out via proton symport	h[e] + met-L[e] <==> h[c] + met-L[c]	Transport	TC-2.A.3.8
METTRS	Methionyl-tRNA synthetase	[c] : atp + met-L + trnamet --> amp + mettrna + ppi	Other function	EC-6.1.1.10	MG021
MG2abc	Magnesium transport	atp[c] + mg2[e] + h2o[c] --> adp[c] + mg2[c] + h[c] + pi[c]	Transport
MLN7t	Menaquinone transport	mqn7[e] --> mqn7[c]	Transport
MMSAD3	methylmalonate-semialdehyde dehydrogenase (malonic semialdehyde)	[c] : coa + msa + nad --> accoa + co2 + nadh	Amino acids and related molecules	EC-1.2.1.27
MNabc	manganese transport via ABC system	atp[c] + h2o[c] + mn2[e] --> adp[c] + h[c] + mn2[c] + pi[c]	Transport	TC-3.A.1.15
MNLpts	mannitol transport via PEP:Pyr PTS	mnl[e] + pep[c] --> mnl1p[c] + pyr[c]	Transport		MG041 and MG429
MOBDabc	molybdate transport via ABC system	atp[c] + h2o[c] + mobd[e] --> adp[c] + h[c] + mobd[c] + pi[c]	Transport	TC-3.A.1.8
MTHFC	methenyltetrahydrofolate cyclohydrolase	[c] : h2o + methf <==> 10fthf + h	Coenzymes and prosthetic groups	EC-3.5.4.9	MG013
MTHFD	methylenetetrahydrofolate dehydrogenase (NADP)	[c] : mlthf + nadp <==> methf + nadph	Coenzymes and prosthetic groups	EC-1.5.1.5	MG013
NACUP	Nicotinic acid uptake	nac[e] --> nac[c]	Transport
NADH5	NADH dehydrogenase (Menaquinone 7 & 2 protons)	(3) h[c] + mqn7[c] + nadh[c] --> (2) h[e] + mql7[c] + nad[c]	Energy Metabolism	EC-1.6.5.3,	MG275
NADK	NAD kinase	[c] : atp + nad --> adp + h + nadp	Cofactor and Prosthetic Group Biosynthesis	EC-2.7.1.23	MG128
NADS1	NAD synthase (nh4)	[c] : atp + dnad + nh4 --> amp + h + nad + ppi	Vitamins & Cofactor Biosynthesis	EC-6.3.1.5	MG383
NAMNPP	nicotinic acid mononucleotide pyrophosphorylase	[c] : atp + h2o + nac + prpp --> adp + nicrnt + pi + ppi	Nucleotides and nucleic acids		MG037
NDPK1	nucleoside-diphosphate kinase (ATP:GDP)	[c] : atp + gdp <==> adp + gtp	Nucleotides and nucleic acids	EC-2.7.4.6
NDPK2	nucleoside-diphosphate kinase (ATP:UDP)	[c] : atp + udp <==> adp + utp	Nucleotides and nucleic acids	EC-2.7.4.6
NDPK3	nucleoside-diphosphate kinase (ATP:CDP)	[c] : atp + cdp <==> adp + ctp	Nucleotides and nucleic acids	EC-2.7.4.6
NDPK4	nucleoside-diphosphate kinase (ATP:dTDP)	[c] : atp + dtdp <==> adp + dttp	Nucleotides and nucleic acids	EC-2.7.4.6
NDPK5	nucleoside-diphosphate kinase (ATP:dGDP)	[c] : atp + dgdp <==> adp + dgtp	Nucleotides and nucleic acids	EC-2.7.4.6
NDPK6	nucleoside-diphosphate kinase (ATP:dUDP)	[c] : atp + dudp <==> adp + dutp	Nucleotides and nucleic acids	EC-2.7.4.6
NDPK7	nucleoside-diphosphate kinase (ATP:dCDP)	[c] : atp + dcdp <==> adp + dctp	Nucleotides and nucleic acids	EC-2.7.4.6
NDPK8	nucleoside-diphosphate kinase (ATP:dADP)	[c] : atp + dadp <==> adp + datp	Nucleotides and nucleic acids	EC-2.7.4.6
NDPK9	nucleoside-diphophate kinase (ATP:IDP)	[c] : atp + idp <==> adp + itp	Nucleotides and nucleic acids	EC-2.7.4.6
NH4t	ammonia transport via diffusion	nh4[e] <==> nh4[c]	Transport		s0001
NIabc	nickel transport via ABC system	atp[c] + h2o[c] + ni2[e] --> adp[c] + h[c] + ni2[c] + pi[c]	Transport		MG077 and MG079
NMNATr	nicotinamide-nucleotide adenylyltransferase	[c] : atp + h + nmn <==> nad + ppi	Coenzymes and prosthetic groups	EC-2.7.7.1	MG240
NNATr	nicotinate-nucleotide adenylyltransferase	[c] : atp + h + nicrnt <==> dnad + ppi	Coenzymes and prosthetic groups	EC-2.7.7.18	MG240
OHPHM	2-octaprenyl-6-hydroxyphenol methylase	[c] : 2ohph_5 + amet --> 2omph_5 + ahcys + h	Quinone Biosynthesis		MG463
PAP	phosphatidic acid phosphatase	[c] : 12dag3p + h2o --> 12dgr + pi	Lipid & Cell Membrane Metabolism
PBUTT	phosphate butyryltransferase	[c] : btcoa + pi <==> butpi + coa	Carbohydrates and related molecules	EC-2.3.1.19	MG299
PDH	pyruvate dehydrogenase	[c] : coa + nad + pyr --> accoa + co2 + nadh	Central Metabolism	EC-1.2.1.51	MG273 and MG274
PFK	phosphofructokinase	[c] : atp + f6p --> adp + fdp + h	Glycolysis/Gluconeogenesis	EC-2.7.1.11	MG215
PGAMT	phosphoglucosamine mutase	[c] : gam1p <==> gam6p	Carbohydrates and related molecules	EC-5.4.2.10
PGI	glucose-6-phosphate isomerase	[c] : g6p <==> f6p	Carbohydrates and related molecules	EC-5.3.1.9	MG111
PGK	phosphoglycerate kinase	[c] : 13dpg + adp <==> 3pg + atp	Carbohydrates and related molecules	EC-2.7.2.3	MG300
PGM	phosphoglycerate mutase	[c] : 3pg <==> 2pg	Carbohydrates and related molecules	EC-5.4.2.1	MG430
PGMT	phosphoglucomutase	[c] : g1p <==> g6p	Carbohydrates and related molecules	EC-5.4.2.2
PHCYT	phosphatidate cytidylyltransferase	[c] : 12dag3p + ctp + h --> cdpdag + ppi	Lipids	EC-2.7.7.41
PHEt6	L-phenylalanine transport in/out via proton symport	h[e] + phe-L[e] <==> h[c] + phe-L[c]	Transport	TC-2.A.3.1
PHETRS	Phenylalanyl-tRNA synthetase	[c] : atp + phe-L + trnaphe --> amp + phetrna + ppi	Tyrosine, Tryptophan, and Phenylalanine Metabolism	EC-6.1.1.20	MG194 and MG195
PIabc	phosphate transport via ABC system	atp[c] + h2o[c] + pi[e] --> adp[c] + h[c] + (2) pi[c]	Transport	TC-3.A.1.7	MG410 and MG411
PMANM	phosphomannomutase	[c] : man1p <==> man6p	Carbohydrates and related molecules	EC-5.4.2.8	MG053
PPA	inorganic diphosphatase	[c] : h2o + ppi --> h + (2) pi	Anaplerotic Reactions	EC-3.6.1.1	MG351
PPAK	Propionate kinase	[c] : adp + ppap <==> atp + ppa	Carbohydrates and related molecules		MG357
PPAt6	propionate transport in/out via proton symport	h[e] + ppa[e] <==> h[c] + ppa[c]	Transport	TC-2.A.20
PROt2	L-proline transport in via proton symport	h[e] + pro-L[e] --> h[c] + pro-L[c]	Transport
PROTRS	Prolyl-tRNA synthetase	[c] : atp + pro-L + trnapro --> amp + ppi + protrna	Arginine and Proline Metabolism	EC-6.1.1.15	MG283
PRPPS	phosphoribosylpyrophosphate synthetase	[c] : atp + r5p <==> amp + h + prpp	Nucleotides and nucleic acids	EC-2.7.6.1	MG058
PSUDS	pseudouridylate synthase	[c] : r5p + ura --> h2o + psd5p		EC-4.2.1.70	MG370 and MG209
PTA2r	Phosphate acetyltransferase	[c] : pi + ppcoa <==> coa + ppap	Carbohydrates and related molecules		MG299
PTAr	phosphotransacetylase	[c] : accoa + pi <==> actp + coa	Carbohydrates and related molecules	EC-2.3.1.8	MG299
PTRCabc	putrescine transport via ABC system	atp[c] + h2o[c] + ptrc[e] --> adp[c] + h[c] + pi[c] + ptrc[c]	Transport	TC-3.A.1.11	MG042 and MG043 and MG044
PTRCORNt7	putrescine/ornithine antiporter	orn-L[c] + ptrc[e] <==> orn-L[e] + ptrc[c]	Transport		MG226
PTRCt2	putrescine transport in via proton symport, reversible	h[e] + ptrc[e] <==> h[c] + ptrc[c]	Transport		MG226 and MG225
PUNP1	purine-nucleoside phosphorylase (Adenosine)	[c] : adn + pi <==> ade + r1p	Nucleotide Salvage Pathways	EC-2.4.2.1	MG049
PUNP2	purine-nucleoside phosphorylase (Deoxyadenosine)	[c] : dad-2 + pi <==> 2dr1p + ade	Nucleotide Salvage Pathways	EC-2.4.2.1	MG049
PUNP3	purine-nucleoside phosphorylase (Guanosine)	[c] : gsn + pi <==> gua + r1p	Nucleotide Salvage Pathways	EC-2.4.2.1	MG049
PUNP4	purine-nucleoside phosphorylase (Deoxyguanosine)	[c] : dgsn + pi <==> 2dr1p + gua	Nucleotide Salvage Pathways	EC-2.4.2.1	MG049
PUNP5	purine-nucleoside phosphorylase (Inosine)	[c] : ins + pi <==> hxan + r1p	Nucleotide Salvage Pathways	EC-2.4.2.1	MG049
PUNP6	purine-nucleoside phosphorylase (Deoxyinosine)	[c] : din + pi <==> 2dr1p + hxan	Nucleotide Salvage Pathways	EC-2.4.2.1	MG049
PUNP7	purine-nucleoside phosphorylase (Xanthosine)	[c] : pi + xtsn <==> r1p + xan	Nucleotide Salvage Pathways	EC-2.4.2.1	MG049
PYDXK	pyridoxal kinase (Pyridoxal)	[c] : atp + pydx --> adp + (2) h + pydx5p	Transport	EC-2.7.1.35
PYDXt	Pyridoxal transport	pydx[e] --> pydx[c]	Transport
PYK	pyruvate kinase	[c] : adp + h + pep --> atp + pyr	Carbohydrates and related molecules	EC-2.7.1.40	MG216
PYNP1r	pyrimidine-nucleoside phosphorylase (cytosine)	[c] : csn + r1p <==> cytd + pi	Nucleotides and nucleic acids	EC-2.4.2.2	MG051
PYNP2	pyrimidine-nucleoside phosphorylase (uracil)	[c] : pi + uri <==> r1p + ura	Nucleotides and nucleic acids	EC-2.4.2.2	MG051
RBFK	riboflavin kinase	[c] : atp + ribflv --> adp + fmn + h	Coenzymes and prosthetic groups	EC-2.7.1.26	MG145
RBK	ribokinase	[c] : atp + rib-D --> adp + h + r5p	Alternate Carbon Metabolism	EC-2.7.1.15
RIBabc	D-ribose transport via ABC system	atp[c] + h2o[c] + rib-D[e] --> adp[c] + h[c] + pi[c] + rib-D[c]	Transport	TC-3.A.1.2	MG119
RIBFLVt2	riboflavin transport in via proton symport	h[e] + ribflv[e] --> h[c] + ribflv[c]	Transport
RNDR1	ribonucleoside-diphosphate reductase (ADP)	[c] : adp + trdrd --> dadp + h2o + trdox	Nucleotides and nucleic acids	EC-1.17.4.1	MG229 and MG230 and MG231
RNDR2	ribonucleoside-diphosphate reductase (GDP)	[c] : gdp + trdrd --> dgdp + h2o + trdox	Nucleotides and nucleic acids	EC-1.17.4.1	MG229 and MG230 and MG231
RNDR3	ribonucleoside-diphosphate reductase (CDP)	[c] : cdp + trdrd --> dcdp + h2o + trdox	Nucleotide Salvage Pathways	EC-1.17.4.1	MG229 and MG230 and MG231
RNDR4	ribonucleoside-diphosphate reductase (UDP)	[c] : trdrd + udp --> dudp + h2o + trdox	Nucleotides and nucleic acids	EC-1.17.4.1	MG229 and MG230 and MG231
RPE	ribulose 5-phosphate 3-epimerase	[c] : ru5p-D <==> xu5p-D	Pentose Phosphate Pathway	EC-5.1.3.1	MG112
RPI	ribose-5-phosphate isomerase	[c] : r5p <==> ru5p-D	Carbohydrates and related molecules	EC-5.3.1.6	MG396
SALCpts	salicin transport via PEP:Pyr PTS	pep[c] + salcn[e] --> pyr[c] + salc6p[c]	Transport		MG041 and MG429
SERt2	L-serine transport in via proton symport	h[e] + ser-L[e] --> h[c] + ser-L[c]	Transport	TC-2.A.42
SERTRS	Seryl-tRNA synthetase	[c] : atp + ser-L + trnaser --> amp + ppi + sertrna	Glycine and Serine Metabolism	EC-6.1.1.11	MG005
SO4t2	sulfate transport in via proton symport	h[e] + so4[e] --> h[c] + so4[c]	Transport	TC-2.A.53
SPMDabc	spermidine transport via ABC system	atp[c] + h2o[c] + spmd[e] --> adp[c] + h[c] + pi[c] + spmd[c]	Transport	TC-3.A.1.11	MG042 and MG043 and MG044
SUCpts	sucrose transport via PEP:Pyr PTS	pep[c] + sucr[e] --> pyr[c] + suc6p[c]	Transport		MG041 and MG429
TECA4S	minor teichoic acid synthesis (n=30)	[c] : (30) h2o + (30) uacgala + (30) udpg --> (60) h + tcam + (30) udp + (30) ump	Cell Envelope Biosynthesis		MG025
TEICH45	teichuronic acid (n=45), unlinked, GalNAc-GlcA repeated	[c] : (45) uacgala + (45) udpglcur <==> (45) h + teich-45 + (45) udp + (45) ump	Cell Envelope Biosynthesis		MG075
THDPO	thiol peroxidase	[c] : h2o2 + trdrd --> (2) h2o + trdox			MG124
THM2t2	Thiamine transport in via proton symport	h[e] + thm[e] --> h[c] + thm[c]	Transport
THMDt2	thymidine transport in via proton symport	h[e] + thymd[e] --> h[c] + thymd[c]	Transport
THRTRS	Threonyl-tRNA synthetase	[c] : atp + thr-L + trnathr --> amp + ppi + thrtrna	Threonine and Lysine Metabolism	EC-6.1.1.3	MG375
THZPSN	thiazole phosphate synthesis	[c] : atp + cys-L + dxyl5p + tyr-L --> 4hba + 4mpetz + ala-L + amp + co2 + h + h2o + ppi	Cofactor and Prosthetic Group Biosynthesis		MG372
TKT1	transketolase	[c] : r5p + xu5p-D <==> g3p + s7p	Carbohydrates and related molecules	EC-2.2.1.1	MG066
TKT2	transketolase	[c] : e4p + xu5p-D <==> f6p + g3p	Carbohydrates and related molecules	EC-2.2.1.1	MG066
TMDK1	thymidine kinase (ATP:thymidine)	[c] : atp + thymd --> adp + dtmp + h	Nucleotide Salvage Pathway	EC-2.7.1.21	MG034
TMDPK	thiamine diphosphokinase	[c] : atp + thm --> amp + h + thmpp	Transport	EC-2.7.6.2
TMDPP	thymidine phosphorylase	[c] : pi + thymd <==> 2dr1p + thym	Nucleotides and nucleic acids	EC-2.4.2.4	MG051
TMDS	thymidylate synthase	[c] : dump + mlthf --> dhf + dtmp	Nucleotides and nucleic acids	EC-2.1.1.45	MG227
TPI	triose-phosphate isomerase	[c] : dhap <==> g3p	Carbohydrates and related molecules	EC-5.3.1.1	MG431
TRDR	thioredoxin reductase (NADPH)	[c] : h + nadph + trdox --> nadp + trdrd	Membrane bioenergetics	EC-1.8.1.9	MG102
TREpts	trehalose transport via PEP:Pyr PTS	pep[c] + tre[e] --> pyr[c] + tre6p[c]	Transport		MG041 and MG429
TRIA	membrane alanyl aminopeptidase	[c] : cgly + h2o <==> cys-L + gly	Amino acids and related molecules	EC-3.4.11.2
TRPt2	L-tryptophan transport in via proton symport	h[e] + trp-L[e] --> h[c] + trp-L[c]	Transport	TC-2.A.3.1
TRPTRS	Tryptophanyl-tRNA synthetase	[c] : atp + trnatrp + trp-L --> amp + ppi + trptrna	tRNA Charging	EC-6.1.1.2	MG126
TYRt2	tyrosine peroxisomal transport via proton symport	h[c] + tyr-L[c] <==> h[e] + tyr-L[e]	Transport
TYRTRS	Tyrosyl-tRNA synthetase	[c] : atp + trnatyr + tyr-L --> amp + ppi + tyrtrna	Tyrosine, Tryptophan, and Phenylalanine Metabolism	EC-6.1.1.1	MG455
UAG4E	UDP-N-acetylglucosamine 4-epimerase	[c] : uacgam --> uacgala	Carbohydrates and related molecules	EC-5.1.3.7	MG118
UAGDP	UDP-N-acetylglucosamine diphosphorylase	[c] : acgam1p + h + utp --> ppi + uacgam	Lipid & Cell Membrane Metabolism	EC-2.7.7.23
UDPG4E	UDPglucose 4-epimerase	[c] : udpg <==> udpgal	Carbohydrates and related molecules	EC-5.1.3.2	MG118
UDPGALM	UDPgalactopyranose mutase	[c] : udpgal --> udpgalfur	Cell Envelope Biosynthesis	EC-5.4.99.9	MG137
UDPGD	UDPglucose 6-dehydrogenase	[c] : h2o + (2) nad + udpg <==> (3) h + (2) nadh + udpglcur	Lipid & Cell Membrane Metabolism	EC-1.1.1.22
UGT1	UDP-glucosyltransferase (monoglucosyl)	[c] : 12dgr + udpg --> h + m12dg + udp	Lipid & Cell Membrane Metabolism
UGT2	UDP-glucosyltransferase (diglucosyl)	[c] : m12dg + udpg --> h + d12dg + udp	Lipid & Cell Membrane Metabolism
UGT3	UDP-glucosyltransferase (triglucosyl)	[c] : d12dg + udpg --> h + t12dg + udp	Lipid & Cell Membrane Metabolism
UPPRT	uracil phosphoribosyltransferase	[c] : prpp + ura --> ppi + ump	Nucleotides and nucleic acids	EC-2.4.2.9	MG030
URAt2	uracil transport in via proton symport	h[e] + ura[e] --> h[c] + ura[c]	Transport	TC-2.A.40
URIDK1	uridylate kinase (UMP)	[c] : atp + ump --> adp + udp	Nucleotides and nucleic acids		MG330 and MG434
URIDK3	uridylate kinase (dUMP)	[c] : atp + dump <==> adp + dudp	Nucleotides and nucleic acids	EC-2.7.4.4	MG330 and MG434
URIK1	uridine kinase (ATP:Uridine)	[c] : atp + uri --> adp + h + ump	Nucleotides and nucleic acids	EC-2.7.1.48	MG382
URIK2	uridine kinase (GTP:Uridine)	[c] : gtp + uri --> gdp + h + ump	Nucleotides and nucleic acids	EC-2.7.1.48	MG382
URIK3	uridine kinase (ITP:Uridine)	[c] : itp + uri --> h + idp + ump	Nucleotides and nucleic acids	EC-2.7.1.48	MG382
VALt2	L-valine transport in via proton symport	h[e] + val-L[e] --> h[c] + val-L[c]	Transport
VALTRS	Valyl-tRNA synthetase	[c] : atp + trnaval + val-L --> amp + ppi + valtrna	tRNA Charging	EC-6.1.1.9	MG334
ZN2t4	zinc transport out via antiport	h[e] + k[e] + zn2[c] --> h[c] + k[c] + zn2[e]	Transport

## Sheet: Exchange Reactions
Abbreviation	Equation
EX_ac(e)	[e] : ac <==>
EX_acgam(e)	[e] : acgam <==>
EX_acoa(e)	[e] : acoa <==>
EX_ade(e)	[e] : ade <==>
EX_akg(e)	[e] : akg <==>
EX_ala-L-asp-L(e)	[e] : ala-L-asp-L <==>
EX_ala-L-gln-L(e)	[e] : ala-L-gln-L <==>
EX_ala-L-glu-L(e)	[e] : ala-L-glu-L <==>
EX_ala-L-his-L(e)	[e] : ala-L-his-L <==>
EX_ala-L-leu-L(e)	[e] : ala-L-leu-L <==>
EX_ala-L-thr-L(e)	[e] : ala-L-thr-L <==>
EX_arbt(e)	[e] : arbt <==>
EX_arg-L(e)	[e] : arg-L <==>
EX_asn-L(e)	[e] : asn-L <==>
EX_ca2(e)	[e] : ca2 <==>
EX_cellb(e)	[e] : cellb <==>
EX_cgly(e)	[e] : cgly <==>
EX_cl(e)	[e] : cl <==>
EX_co2(e)	[e] : co2 <==>
EX_coa(e)	[e] : coa <==>
EX_cobalt2(e)	[e] : cobalt2 <==>
EX_csn(e)	[e] : csn <==>
EX_cu2(e)	[e] : cu2 <==>
EX_datp(e)	[e] : datp <==>
EX_dgtp(e)	[e] : dgtp <==>
EX_fe2(e)	[e] : fe2 <==>
EX_fe3(e)	[e] : fe3 <==>
EX_fol(e)	[e] : fol <==>
EX_fru(e)	[e] : fru <==>
EX_gal(e)	[e] : gal <==>
EX_gam(e)	[e] : gam <==>
EX_glc-D(e)	[e] : glc-D <==>
EX_glu-L(e)	[e] : glu-L <==>
EX_gly-asn-L(e)	[e] : gly-asn-L <==>
EX_gly-asp-L(e)	[e] : gly-asp-L <==>
EX_gly-gln-L(e)	[e] : gly-gln-L <==>
EX_gly-glu-L(e)	[e] : gly-glu-L <==>
EX_gly-met-L(e)	[e] : gly-met-L <==>
EX_gly-pro-L(e)	[e] : gly-pro-L <==>
EX_glyc3p(e)	[e] : glyc3p <==>
EX_glyc(e)	[e] : glyc <==>
EX_gtp(e)	[e] : gtp <==>
EX_h2o(e)	[e] : h2o <==>
EX_h(e)	[e] : h <==>
EX_his-L(e)	[e] : his-L <==>
EX_ile-L(e)	[e] : ile-L <==>
EX_k(e)	[e] : k <==>
EX_L-alagly(e)	[e] : L-alagly <==>
EX_lac-L(e)	[e] : lac-L <==>
EX_leu-L(e)	[e] : leu-L <==>
EX_lys-L(e)	[e] : lys-L <==>
EX_malt(e)	[e] : malt <==>
EX_man(e)	[e] : man <==>
EX_met-L-ala-L(e)	[e] : met-L-ala-L <==>
EX_met-L(e)	[e] : met-L <==>
EX_mg2(e)	[e] : mg2 <==>
EX_mn2(e)	[e] : mn2 <==>
EX_mnl(e)	[e] : mnl <==>
EX_mobd(e)	[e] : mobd <==>
EX_mqn7(e)	[e] : mqn7 <==>
EX_nac(e)	[e] : nac <==>
EX_nh4(e)	[e] : nh4 <==>
EX_ni2(e)	[e] : ni2 <==>
EX_orn-L(e)	[e] : orn-L <==>
EX_phe-L(e)	[e] : phe-L <==>
EX_pi(e)	[e] : pi <==>
EX_ppa(e)	[e] : ppa <==>
EX_pro-L(e)	[e] : pro-L <==>
EX_ptrc(e)	[e] : ptrc <==>
EX_pydx(e)	[e] : pydx <==>
EX_rib-D(e)	[e] : rib-D <==>
EX_ribflv(e)	[e] : ribflv <==>
EX_salcn(e)	[e] : salcn <==>
EX_ser-L(e)	[e] : ser-L <==>
EX_so4(e)	[e] : so4 <==>
EX_spmd(e)	[e] : spmd <==>
EX_sucr(e)	[e] : sucr <==>
EX_thm(e)	[e] : thm <==>
EX_thymd(e)	[e] : thymd <==>
EX_tre(e)	[e] : tre <==>
EX_trp-L(e)	[e] : trp-L <==>
EX_tyr-L(e)	[e] : tyr-L <==>
EX_ura(e)	[e] : ura <==>
EX_val-L(e)	[e] : val-L <==>
EX_zn2(e)	[e] : zn2 <==>

## Sheet: removed automodel rxns
Abbreviation	Name	Equation (note [c] and [e] at the beginning refer to the compartment the reaction takes place in, cytosolic and extracellular respectively)	Subsystem	Protein Classification	Locus name
5AOPt2	5-Amino-4-oxopentanoate transport in via proton symport	5aop[e] + h[e] --> 5aop[c] + h[c]	Transport		MG_432
ATPS3r	ATPase	adp[c] + (3) h[e] + pi[c] <==> atp[c] + (2) h[c] + h2o[c]	Membrane bioenergetics
ATPS4	ATP synthase (four protons for one ATP)	adp[c] + (4) h[e] + pi[c] --> atp[c] + (3) h[c] + h2o[c]	Transport	EC-3.6.3.14
ATPSm	ATP synthase, mitochondrial	adp[c] + (3) h[e] + pi[c] --> atp[c] + (2) h[c] + h2o[c]	Oxidative Phosphorylation	EC-3.6.3.14
GABAt2	4-aminobutyrate transport in via proton symport	4abut[e] + h[e] --> 4abut[c] + h[c]	Transport		MG_432
GTPDPK	GTP diphosphokinase	[c] : atp + gtp --> amp + gdptp + h	Nucleotides and nucleic acids	EC-2.7.6.5	MG_278
NADDP	NAD diphosphatase	[c] : h2o + nad --> amp + (2) h + nmn	Cofactor and Prosthetic Group Biosynthesis	EC-3.6.1.22	MG_254
PFLi	pyruvate formate lyase	[c] : coa + pyr --> accoa + for	Pyruvate Metabolism		MG_423
PGDH	phosphogluconate dehydrogenase	[c] : 6pgc + nadp --> co2 + nadph + ru5p-D	Pentose Phosphate Pathway	EC-1.1.1.44	MG_439
PROTSYN_Eco	Protein synthesis, E. coli	[c] : (103) alatrna + (59) argtrna + (48) asntrna + (48) asptrna + (18) cystrna + (53) glntrna + (53) glutrna + (53) glytrna + (2000) gtp + (2000) h2o + (19) histrna + (58) iletrna + (90) leutrna + (69) lystrna + (31) mettrna + (37) phetrna + (44) protrna + (43) sertrna + (51) thrtrna + (11) trptrna + (28) tyrtrna + (85) valtrna --> (2000) gdp + (3001) h + (2000) pi + protein_Eco + (103) trnaala …	Macromolecule Synthesis
PROTSYN_Hin	Protein synthesis, H. influenzae	[c] : (84) alatrna + (45) argtrna + (49) asntrna + (50) asptrna + (10) cystrna + (46) glntrna + (65) glutrna + (66) glytrna + (2000) gtp + (2000) h2o + (21) histrna + (71) iletrna + (105) leutrna + (63) lystrna + (24) mettrna + (45) phetrna + (37) protrna + (58) sertrna + (52) thrtrna + (11) trptrna + (31) tyrtrna + (67) valtrna --> PROTEIN_Hin + (2000) gdp + (2000) h + (2000) pi + (84) trnaala +…	Macromolecule Synthesis
THRD_L	L-threonine deaminase	[c] : thr-L --> 2obut + nh4	Valine, Leucine, and Isoleucine Metabolism		MG_075
URIDK2	uridylate kinase (dUMP)	[c] : atp + dump --> adp + dudp	Nucleotides and nucleic acids		MG_330 and MG_434
BUTKr	butyrate kinase	[c] : atp + but <==> adp + butpi	Carbohydrates and related molecules	EC-2.7.2.7	MG237
LDH2	L-lactate dehydrogenase (2-Hydroxybutanoic acid)	[c] : 2hbut + nad <==> 2obut + h + nadh	Membrane bioenergetics	EC-1.1.1.27	MG460
